# Supplementary material for: The retinal microcirculation in migraine: The Rotterdam Study
Source: PubMed Central journal article supplement — Cephalalgia. 2017 May 10;38(4):736–43. doi: 10.1177/0333102417708774 (PMC5896692; doi:10.1177/0333102417708774), 2017-05-10
Supplement: Supplemental_material.pdf [file Supplemental_material.pdf]

**Supplementary Figure 1 (S1). Flowchart of study participants.**

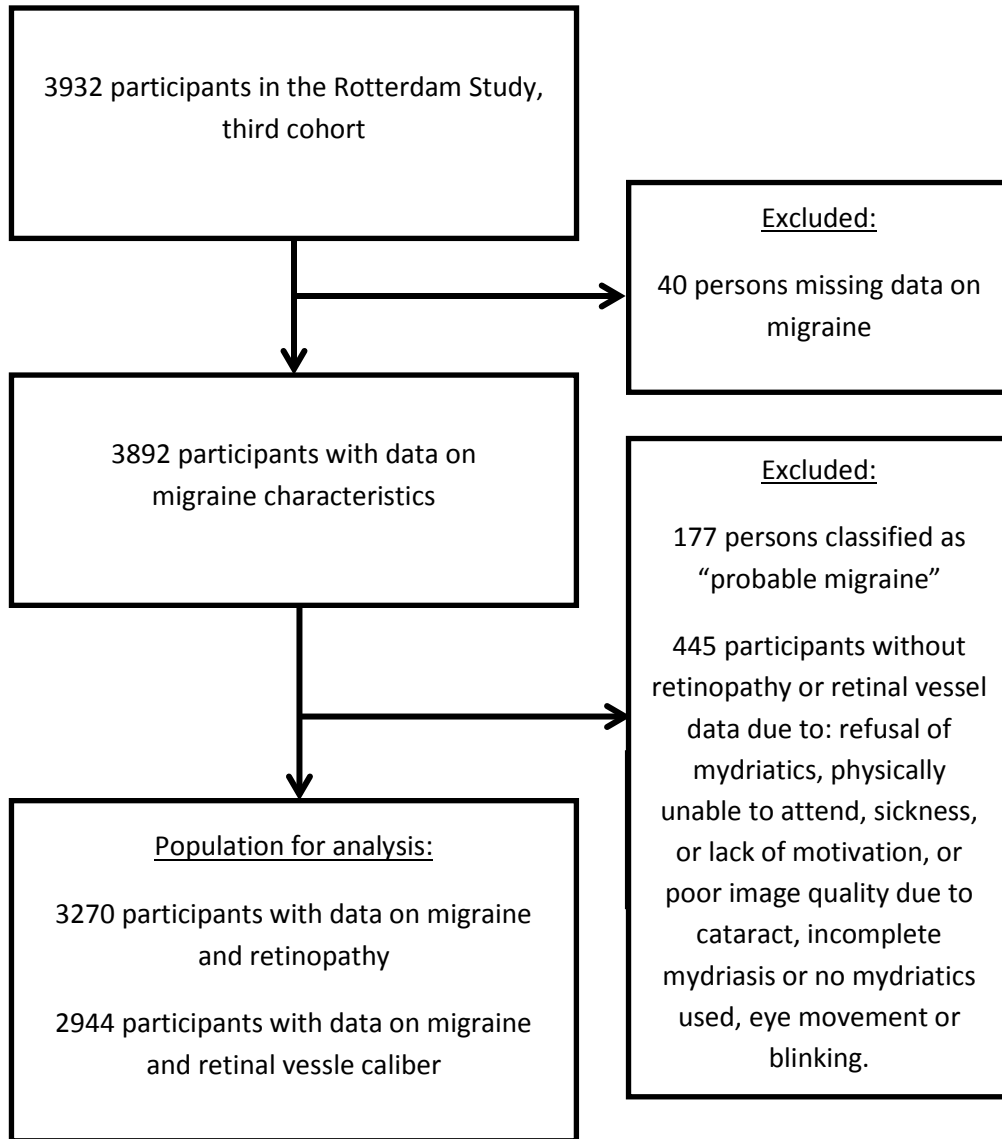

Supplementary Table 1.

| Supplementary Table 2 (S2). Number of missing values for each covariate. |                      |                           |
|--------------------------------------------------------------------------|----------------------|---------------------------|
|                                                                          | No migraine (n=2708) | Definite migraine (n=562) |
| Education level                                                          | 20 (0.74)            | 2 (0.36)                  |
| Smoking                                                                  | 2 (0.07)             | 0                         |
| Systolic blood pressure (mmHg)                                           | 13 (0.48)            | 0                         |
| Diastolic blood pressure (mmHg)                                          | 13 (0.48)            | 0                         |
| C-reactive protein (mg/L) (log-transformed)                              | 92 (3.40)            | 27 (4.80)                 |
| Total cholesterol (mmol/L)                                               | 33 (1.22)            | 11 (1.95)                 |
| High-density lipoprotein cholesterol (mmol/L)                            | 33 (1.22)            | 11 (1.95)                 |
| Serum lipid reducing medication use                                      | 25 (0.92)            | 1 (0.18)                  |
| Antihypertensive use                                                     | 25 (0.92)            | 2 (0.36)                  |
| Presence of atherosclerotic plaque                                       | 13 (0.48)            | 2 (0.36)                  |
| Diabetes mellitus                                                        | 41 (1.51)            | 12 (2.14)                 |
| Values are given as counts with corresponding percentage.                |                      |                           |
